# Supplementary material for: Statistical Modelling of the Annual Rainfall Pattern in Guanacaste, Costa Rica
Source: MDPI journal article supplement (doi:10.3390/w15040700), 2023-02-10
Supplement: s1 [file s1]

Archive with 1 entries (1 files):
- water-2158754-supplementary.pdf
